# Supplementary material for: A model-based insight into the coupling of nitrogen and sulfur cycles in a coastal upwelling system
Source: PubMed Central journal article supplement — J Geophys Res Biogeosci. 2014 Mar 19;119(3):264–85. doi: 10.1002/2012JG002271 (PMC4508913; doi:10.1002/2012jg002271), 2014-03-19
Supplement: jgrg0119-0264-sd1.pdf [file jgrg0119-0264-sd1.pdf]

**Auxiliary material for “A model-based insight into the coupling of nitrogen and sulfur cycles in a coastal upwelling system”.**

Muchamad Al Azhar, Donald E. Canfield, Katja Fennel, Bo Thamdrup, Christian J. Bjerrum

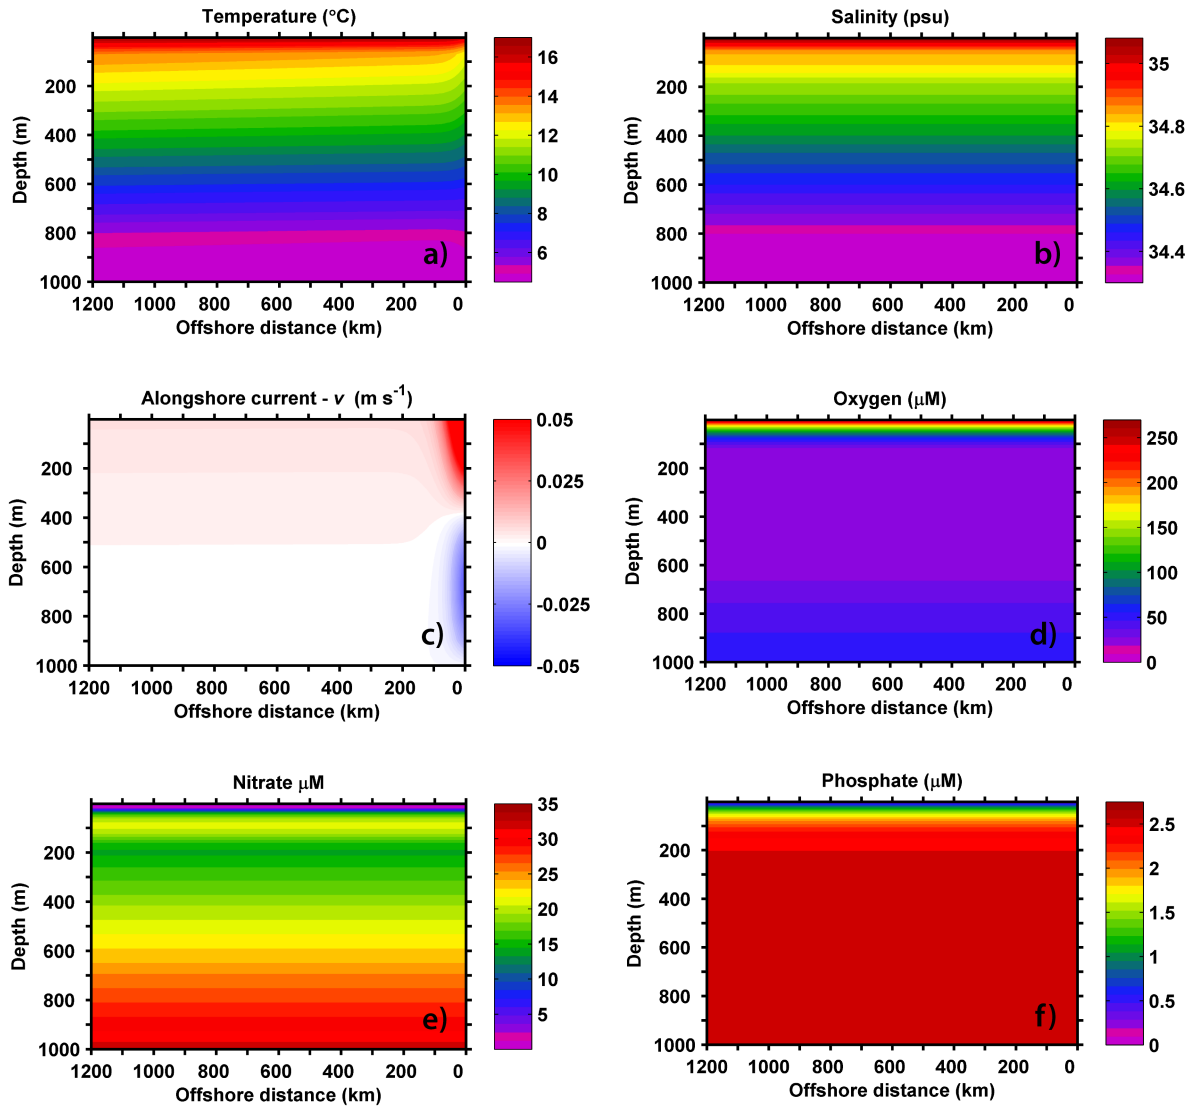

**Figure S1.**

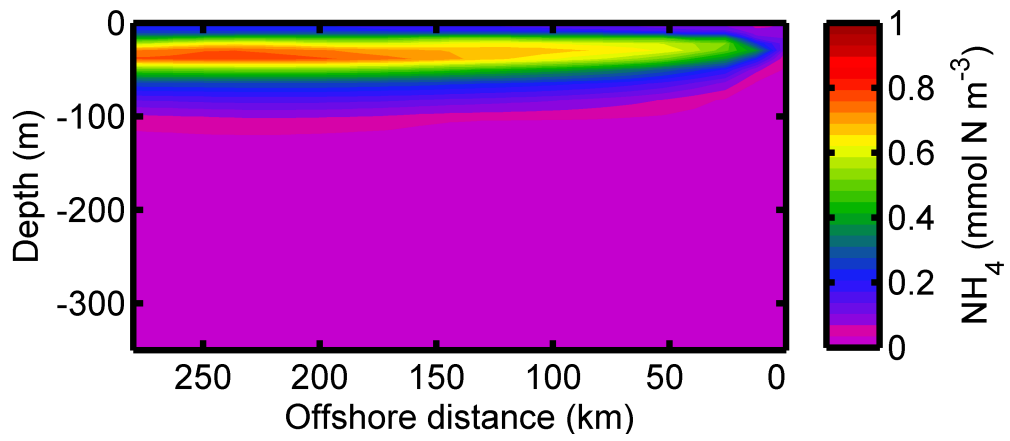

Figure S2.
