# Supplementary material for: A model-based insight into the coupling of nitrogen and sulfur cycles in a coastal upwelling system
Source: PubMed Central journal article supplement — J Geophys Res Biogeosci. 2014 Mar 19;119(3):264–85. doi: 10.1002/2012JG002271 (PMC4508913; doi:10.1002/2012jg002271), 2014-03-19
Supplement: jgrg0119-0264-sd2.pdf [file jgrg0119-0264-sd2.pdf]

README.txt

Auxiliary Material Submission for Paper 2012JG002271  
A new model based insight into the couple of nitrogen and cryptic sulfur cycles in a coastal upwelling systems. doi:10.1029/2012JG002271.

Azhar, M. A., Canfield, D. E., Fennel, K., Thamdrup, B., Bjerrum, C. J.

Muchamad Al Azhar and Christian J. Bjerrum  
Nordic Center for Earth Evolution (NordCEE) and Department of Geosciences and Natural Resource Management, University of Copenhagen, Øster Voldgade 10, DK-1350 København K, Denmark.

Donald E. Canfield and Bo Thamdrup  
Nordic Center for Earth Evolution (NordCEE) and Institute of Biology, University of Southern Denmark, Campusvej 55, 5230 Odense M, Denmark.

Katja Fennel  
Department of Oceanography, Dalhousie University, 1355 Oxford Street, Halifax, Nova Scotia B3H 4R2, Canada.

This supplemental material contains figures describing 1) cross-shore section of initial and boundary values of temperature, salinity, alongshore current, oxygen, nitrate, and phosphate used in the model and 2) cross-shore section of ammonium concentration produced by the model.

1. Figure S1. Cross-shore section of alongshore-averaged initial and boundary values for a) temperature, b) salinity, c) alongshore current, d) oxygen, e) nitrate, and f) phosphate. Please note thermocline tilts upward near the coast in the temperature profile, as well as the resulting poleward (southward) undercurrent in the alongshore-current profile.

2. Figure S2. Cross-shore section of ammonium concentration. The plot is averaged alongshore in the month of January at the last two years of the simulation. Importantly, maximum ammonium concentration is approximately located in 240 km offshore at the depth of 30 m. Lower than 100 m water depth, the ammonium concentrations are between 0.01 and 0.03 mmol N m<sup>-3</sup>.
